# Supplementary material for: Ultrasound-assisted formation of composite materials from fish scale waste hydroxyapatite in the presence of gamma-irradiated chitosan for the removal of malachite green
Source: Royal Society of Chemistry journal article supplement (doi:10.1039/d4ra03102d), 2024-01-01
Supplement: d4ra03102d1.pdf [file d4ra03102d1.pdf]

1 **Supplementary Information**

2  
3 **Ultrasound-assisted formation of composite materials from fish scale waste**  
4 **hydroxyapatite in the presence of gamma-irradiated chitosan for the removal of**  
5 **malachite green**

6  
7 Nattaporn Keanjun<sup>1,a</sup>, Thitirat Rattanawongwiboon<sup>2,a</sup>, Phitchan Sricharoen<sup>3\*</sup>, Sakchai  
8 Laksee<sup>3</sup>, Naengnoi Saengsane<sup>4</sup>, Yanisa Thepchuay<sup>4</sup>, Paweena Porrawatkul<sup>4</sup>, Rungnapa  
9 Pimsen<sup>4</sup>, Arnannit Kuyyogsuy<sup>4</sup>, Prawit Nuengmatcha<sup>4</sup>, Saksit Chanthai<sup>5</sup>, Maliwan  
10 Subsadsana<sup>6</sup> and Nunticha Limchoowong<sup>1\*\*</sup>  
11

12 <sup>1</sup>Department of Chemistry, Faculty of Science, Srinakharinwirot University, Bangkok ,  
13 10110, Thailand

14 <sup>2</sup>Nuclear Technology Research and Development Center, Thailand Institute of Nuclear  
15 Technology (Public Organization), Nakhon Nayok 26120, Thailand

16 <sup>3</sup>Division of Health, Cosmetic and Anti-Aging Technology, Faculty of Science and  
17 Technology, Rajamangala University of Technology Phra Nakhon, Bangkok 10800, Thailand

18 <sup>4</sup>Nanomaterials Chemistry Research Unit, Department of Chemistry, Faculty of Science and  
19 Technology, Nakhon Si Thammarat Rajabhat University, Nakhon Si Thammarat 80280,  
20 Thailand

21 <sup>5</sup>Materials Chemistry Research Center, Department of Chemistry and Center of Excellence  
22 for Innovation in Chemistry, Faculty of Science, Khon Kaen University, Khon Kaen 40002,  
23 Thailand

24 <sup>6</sup>Program of Chemistry, Faculty of Science and Technology, Nakhon Ratchasima Rajabhat  
25 University, Nakhon Ratchasima, 30000, Thailand

26  
27 Corresponding author; e-mail: phitchan.s@rmutp.ac.th (P. Sricharoen)\*  
28 nunticha@g.swu.ac.th (N. Limchoowong)\*\*  
29

30 <sup>a</sup>These authors contributed equally to this work.  
31  
32  
33  
34  
35  
36  
37  
38  
39  
40  
41  
42

43 **3.2. X-ray diffraction (XRD)**

44

45

46

47

48

49

50

51

52

53

54

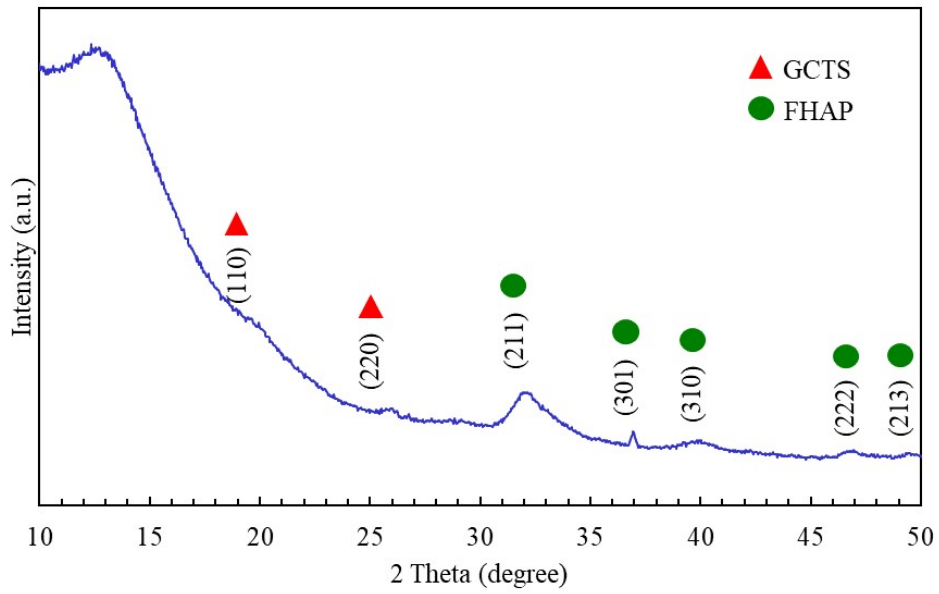

**Fig. S1.** XRD patterns of FHAP-GCTS composites.
